# Supplementary material for: Effect of nanosecond-pulsed plasma on the structural modification of biomolecules
Source: Royal Society of Chemistry journal article supplement (doi:10.1039/c5ra04993h), 2015-01-01
Supplement: c5ra04993h1.xlsx [file c5ra04993h1.xlsx]

## Sheet: Lysine
Component Name		Curve Index	Weighting Index	Origin Index	Equation
Lysine		Linear	Equal	Force	Y = 9.10865e+006*X R^2 = 0.9795
Filename	Sample Type	Sample Name	Sample ID	Exp Amt	Calc Amt	Units	%Diff	Level	%RSD-AMT	Peak Status	Response	Response Type	Equation	Area	Height	ISTD Area	ISTD Ht	RT	Rel RT	Del RT	S/N	Start Time	End Time	Start Height	End Height	Integ Code	Search Window	Threshold	Smooth	Acq Date	Duration	Exp Method	Proc Method	Vial	Inj Vol	Sample Wt	Sample Vol	ISTD Base Amt	ISTD Calc Amt	Dilution Factor	Study	Client	Laboratory	Company	Phone	Comment
STD_mix_333ng_1	Std Bracket Sample		STD_mix_333ng_1	0.333	0.508401	ug/ml	0.52673	0.333	0.258588		NA	NA	Y = 9.10865e+006*X R^2 = 0.9795	4.63085e+06	353762	NA	NA	0.793667	0.793667	0.206333	45.0744	0.596667	1.1125	-788.615	12598.3	SS	60	3	3	2013-12-11 19:01:13	19.9905	C:\Xcalibur\data\20131211_Park_Amino\INNO5_LYS_PRO_THR_Q1	C:\Xcalibur\data\20131211_Park_Amino\AA_Q_1211_1	B:27	10	0	0	NA	NA	1
STD_mix_333ng_2	Std Bracket Sample		STD_mix_333ng_2	0.333	0.735926	ug/ml	1.20999	0.333	0.258588		NA	NA		6.70329e+06	535893	NA	NA	0.7995	0.7995	0.2005	114.956	0.603167	1.11717	5914.18	23676.6	SS	60	3	3	2013-12-12 06:02:36	19.9913	C:\Xcalibur\data\20131211_Park_Amino\INNO5_LYS_PRO_THR_Q1	C:\Xcalibur\data\20131211_Park_Amino\AA_Q_1211_1	B:27	10	0	0	NA	NA	1
STD_mix_333ug_1	Std Bracket Sample		STD_mix_333ug_1	333	306.769	ug/ml	-0.0787711	333	0.0994326		NA	NA		2.79425e+09	1.84577e+08	NA	NA	0.8105	0.8105	0.1895	1005.04	0.605	1.31967	939728	8.92639e+06	SS	60	3	3	2013-12-11 20:03:13	20.0305	C:\Xcalibur\data\20131211_Park_Amino\INNO5_LYS_PRO_THR_Q1	C:\Xcalibur\data\20131211_Park_Amino\AA_Q_1211_1	B:30	10	0	0	NA	NA	1
STD_mix_333ug_2	Std Bracket Sample		STD_mix_333ug_2	333	353.169	ug/ml	0.0605679	333	0.0994326	Response High	NA	NA		3.21689e+09	2.05771e+08	NA	NA	0.8375	0.8375	0.1625	641.605	0.605333	1.37233	1.06378e+06	9.27022e+06	SS	60	3	3	2013-12-12 07:04:33	19.978	C:\Xcalibur\data\20131211_Park_Amino\INNO5_LYS_PRO_THR_Q1	C:\Xcalibur\data\20131211_Park_Amino\AA_Q_1211_1	B:30	10	0	0	NA	NA	1
STD_mix_33ug_1	Std Bracket Sample		STD_mix_33ug_1	33	57.8666	ug/ml	0.753533	33	0.119802		NA	NA		5.27087e+08	3.61879e+07	NA	NA	0.767833	0.767833	0.232167	1026.05	0.6045	1.20517	282841	1.76389e+06	SS	60	3	3	2013-12-11 19:42:35	20.0027	C:\Xcalibur\data\20131211_Park_Amino\INNO5_LYS_PRO_THR_Q1	C:\Xcalibur\data\20131211_Park_Amino\AA_Q_1211_1	B:29	10	0	0	NA	NA	1
STD_mix_33ug_2	Std Bracket Sample		STD_mix_33ug_2	33	68.578	ug/ml	1.07812	33	0.119802		NA	NA		6.24653e+08	4.46783e+07	NA	NA	0.8025	0.8025	0.1975	5842.67	0.610667	1.20917	446103	2.09682e+06	SS	60	3	3	2013-12-12 06:43:58	19.9828	C:\Xcalibur\data\20131211_Park_Amino\INNO5_LYS_PRO_THR_Q1	C:\Xcalibur\data\20131211_Park_Amino\AA_Q_1211_1	B:29	10	0	0	NA	NA	1
STD_mix_3_3ug_1	Std Bracket Sample		STD_mix_3_3ug_1	3.3	6.49658	ug/ml	0.968662	3.3	0.0802165		NA	NA		5.91751e+07	4.21886e+06	NA	NA	0.786333	0.786333	0.213667	696.597	0.604667	1.14733	40352.7	187648	SS	60	3	3	2013-12-11 19:21:53	20.0295	C:\Xcalibur\data\20131211_Park_Amino\INNO5_LYS_PRO_THR_Q1	C:\Xcalibur\data\20131211_Park_Amino\AA_Q_1211_1	B:28	10	0	0	NA	NA	1
STD_mix_3_3ug_2	Std Bracket Sample		STD_mix_3_3ug_2	3.3	7.2779	ug/ml	1.20542	3.3	0.0802165		NA	NA		6.62918e+07	4.96051e+06	NA	NA	0.796667	0.796667	0.203333	824.971	0.612	1.12333	65157.3	204205	SS	60	3	3	2013-12-12 06:23:16	20.0377	C:\Xcalibur\data\20131211_Park_Amino\INNO5_LYS_PRO_THR_Q1	C:\Xcalibur\data\20131211_Park_Amino\AA_Q_1211_1	B:28	10	0	0	NA	NA	1
b1	Unknown Sample		b1	NA	NF	ug/ml	NF	NA	NF	Not Found	NF	NA		NF	NF			NF	NF	NF	NF	NF	NF	NF	NF	NF	60	3	3	2013-12-11 18:40:38	19.9815	C:\Xcalibur\data\20131211_Park_Amino\INNO5_LYS_PRO_THR_Q1	C:\Xcalibur\data\20131211_Park_Amino\AA_Q_1211_1	A:1	10	0	0	0	0	1
b2	Unknown Sample		b2	NA	NF	ug/ml	NA	NA	NA		NA	NA		9.03798e+06	632160	NA	NA	0.796	0.796	0.204	129.164	0.598167	1.8455	-716.13	415.323	BB	60	3	3	2013-12-11 20:23:55	19.9792	C:\Xcalibur\data\20131211_Park_Amino\INNO5_LYS_PRO_THR_Q1	C:\Xcalibur\data\20131211_Park_Amino\AA_Q_1211_1	A:1	10	0	0	NA	NA	1
b3	Unknown Sample		b3	NA	NF	ug/ml	NA	NA	NA		NA	NA		741774	49215	NA	NA	0.733667	0.733667	0.266333	7.83599	0.601667	1.12833	-876.135	-1898.81	BB	60	3	3	2013-12-11 23:29:58	19.9755	C:\Xcalibur\data\20131211_Park_Amino\INNO5_LYS_PRO_THR_Q1	C:\Xcalibur\data\20131211_Park_Amino\AA_Q_1211_1	A:1	10	0	0	NA	NA	1
b4	Unknown Sample		b4	NA	NF	ug/ml	NF	NA	NF	Not Found	NF	NA		NF	NF			NF	NF	NF	NF	NF	NF	NF	NF	NF	60	3	3	2013-12-12 02:35:59	20.0193	C:\Xcalibur\data\20131211_Park_Amino\INNO5_LYS_PRO_THR_Q1	C:\Xcalibur\data\20131211_Park_Amino\AA_Q_1211_1	A:1	10	0	0	0	0	1
b5	Unknown Sample		b5	NA	NF	ug/ml	NF	NA	NF	Not Found	NF	NA		NF	NF			NF	NF	NF	NF	NF	NF	NF	NF	NF	60	3	3	2013-12-12 05:41:56	19.9763	C:\Xcalibur\data\20131211_Park_Amino\INNO5_LYS_PRO_THR_Q1	C:\Xcalibur\data\20131211_Park_Amino\AA_Q_1211_1	A:1	10	0	0	0	0	1
b6	Unknown Sample		b6	NA	NF	ug/ml	NA	NA	NA		NA	NA		7.544e+06	480283	NA	NA	0.798	0.798	0.202	48.6598	0.537833	1.32217	-2950.43	-476.32	BB	60	3	3	2013-12-12 07:25:15	19.955	C:\Xcalibur\data\20131211_Park_Amino\INNO5_LYS_PRO_THR_Q1	C:\Xcalibur\data\20131211_Park_Amino\AA_Q_1211_1	A:1	10	0	0	NA	NA	1
Lys_con_3	Unknown Sample		Lys_con_3	NA	84.6834	ug/ml	NA	NA	NA		NA	NA		7.34916e+08	4.6576e+07	NA	NA	0.774833	0.774833	0.225167	6909.16	0.538	2.07583	965.864	183329	BB	60	3	3	2013-12-11 23:09:13	20.0332	C:\Xcalibur\data\20131211_Park_Amino\INNO5_LYS_PRO_THR_Q1	C:\Xcalibur\data\20131211_Park_Amino\AA_Q_1211_1	B:31	10	0	0	NA	NA	1
Lys_Pin	Unknown Sample		Lys_Pin	NA	75.1697	ug/ml	NA	NA	NA		NA	NA		6.84694e+08	4.36075e+07	NA	NA	0.831667	0.831667	0.168333	1049.55	0.544667	2.033	-6003.65	188746	BB	60	3	3	2013-12-11 22:27:50	19.9667	C:\Xcalibur\data\20131211_Park_Amino\INNO5_LYS_PRO_THR_Q1	C:\Xcalibur\data\20131211_Park_Amino\AA_Q_1211_1	B:35	10	0	0	NA	NA	1
Lys_Plane	Unknown Sample		Lys_Plane	NA	74.7757	ug/ml	NA	NA	NA		NA	NA		6.81105e+08	4.44381e+07	NA	NA	0.7755	0.7755	0.2245	902.38	0.539667	2.01717	-8375.17	185734	BB	60	3	3	2013-12-11 22:48:29	20.0377	C:\Xcalibur\data\20131211_Park_Amino\INNO5_LYS_PRO_THR_Q1	C:\Xcalibur\data\20131211_Park_Amino\AA_Q_1211_1	B:36	10	0	0	NA	NA	1

## Sheet: Alanine
Component Name		Curve Index	Weighting Index	Origin Index	Equation
ALa		Linear	Equal	Force	Y = 808516*X R^2 = 0.9979
Filename	Sample Type	Sample Name	Sample ID	Exp Amt	Calc Amt	Units	%Diff	Level	%RSD-AMT	Peak Status	Response	Response Type	Equation	Area	Height	ISTD Area	ISTD Ht	RT	Rel RT	Del RT	S/N	Start Time	End Time	Start Height	End Height	Integ Code	Search Window	Threshold	Smooth	Acq Date	Duration	Exp Method	Proc Method	Vial	Inj Vol	Sample Wt	Sample Vol	ISTD Base Amt	ISTD Calc Amt	Dilution Factor	Study	Client	Laboratory	Company	Phone	Comment
AA_200ng	Std Bracket Sample		AA_200ng	0.2	0.141545	ug/mL	-0.292276	0.2	1.15502		NA	NA	Y = 808516*X R^2 = 0.9979	114441	8721.47	NA	NA	1.20617	1.20617	-0.206167	1.56928	1.10533	1.49767	395.773	-1782.01	MM	90	3	3	2013-11-08 14:02:05	19.9898	C:\Xcalibur\data\20131108_parkJH_amino_Q\CC18_ACN_G_20min_amino_S_1108_2	C:\Xcalibur\data\20131108_parkJH_amino_Q\AA_Q_1	D:2	10	0	0	NA	NA	1
AA_200ng_1	Std Bracket Sample		AA_200ng_1	0.2	NF	ug/mL	NF	0.2	NF	Not Found	NF	NA		NF	NF			NF	NF	NF	NF	NF	NF	NF	NF	NF	90	3	3	2013-11-08 21:16:23	20.0043	C:\Xcalibur\data\20131108_parkJH_amino_Q\CC18_ACN_G_20min_amino_S_1108_2	C:\Xcalibur\data\20131108_parkJH_amino_Q\AA_Q_1	D:2	10	0	0	0	0	1
AA_200ng_2	Std Bracket Sample		AA_200ng_2	0.2	0.146317	ug/mL	-0.268413	0.2	1.15502		NA	NA		118300	10544.5	NA	NA	1.30867	1.30867	-0.308667	1.30142	1.10333	1.51367	1057.65	142.595	MM	90	3	3	2013-11-09 04:30:42	20.0338	C:\Xcalibur\data\20131108_parkJH_amino_Q\CC18_ACN_G_20min_amino_S_1108_2	C:\Xcalibur\data\20131108_parkJH_amino_Q\AA_Q_1	D:2	10	0	0	NA	NA	1
AA_200ng_3	Std Bracket Sample		AA_200ng_3	0.2	NF	ug/mL	NF	0.2	NF	Not Found	NF	NA		NF	NF			NF	NF	NF	NF	NF	NF	NF	NF	NF	90	3	3	2013-11-09 09:41:00	20.0438	C:\Xcalibur\data\20131108_parkJH_amino_Q\CC18_ACN_G_20min_amino_S_1108_2	C:\Xcalibur\data\20131108_parkJH_amino_Q\AA_Q_1	D:2	10	0	0	0	0	1
AA_20ug	Std Bracket Sample		AA_20ug	20	19.5151	ug/mL	-0.0242464	20	0.0350902		NA	NA		1.57782e+07	687607	NA	NA	1.36267	1.36267	-0.362667	62.3277	1.0005	2.44767	2467.45	1487.36	BB	90	3	3	2013-11-08 14:43:20	20.03	C:\Xcalibur\data\20131108_parkJH_amino_Q\CC18_ACN_G_20min_amino_S_1108_2	C:\Xcalibur\data\20131108_parkJH_amino_Q\AA_Q_1	D:4	10	0	0	NA	NA	1
AA_20ug_1	Std Bracket Sample		AA_20ug_1	20	20.8091	ug/mL	0.0404546	20	0.0350902	Response High	NA	NA		1.68245e+07	773240	NA	NA	1.29817	1.29817	-0.298167	66.3915	0.899167	2.44	873.939	754.219	BB	90	3	3	2013-11-08 21:57:45	20.0167	C:\Xcalibur\data\20131108_parkJH_amino_Q\CC18_ACN_G_20min_amino_S_1108_2	C:\Xcalibur\data\20131108_parkJH_amino_Q\AA_Q_1	D:4	10	0	0	NA	NA	1
AA_20ug_2	Std Bracket Sample		AA_20ug_2	20	19.6904	ug/mL	-0.0154776	20	0.0350902		NA	NA		1.592e+07	655769	NA	NA	1.308	1.308	-0.308	171.416	0.997167	2.68783	999.394	-3114.81	BB	90	3	3	2013-11-09 05:11:57	20.0477	C:\Xcalibur\data\20131108_parkJH_amino_Q\CC18_ACN_G_20min_amino_S_1108_2	C:\Xcalibur\data\20131108_parkJH_amino_Q\AA_Q_1	D:4	10	0	0	NA	NA	1
AA_20ug_3	Std Bracket Sample		AA_20ug_3	20	4.50656	ug/mL	-0.774672	20	NA	Excluded	NA	NA		3.64363e+06	163764	NA	NA	1.38383	1.38383	-0.383833	12.5184	0.898167	2.12533	-914.02	1297	BB	90	3	3	2013-11-09 10:22:21	20.0133	C:\Xcalibur\data\20131108_parkJH_amino_Q\CC18_ACN_G_20min_amino_S_1108_2	C:\Xcalibur\data\20131108_parkJH_amino_Q\AA_Q_1	D:4	10	0	0	NA	NA	1
AA_2ug	Std Bracket Sample		AA_2ug	2	2.25477	ug/mL	0.127383	2	0.711583		NA	NA		1.82301e+06	79109.2	NA	NA	1.292	1.292	-0.292	14.8111	0.9985	1.77333	-1327.37	1532.9	BM	90	3	3	2013-11-08 14:22:41	19.9762	C:\Xcalibur\data\20131108_parkJH_amino_Q\CC18_ACN_G_20min_amino_S_1108_2	C:\Xcalibur\data\20131108_parkJH_amino_Q\AA_Q_1	D:3	10	0	0	NA	NA	1
AA_2ug_1	Std Bracket Sample		AA_2ug_1	2	2.16884	ug/mL	0.0844177	2	0.711583		NA	NA		1.75354e+06	81508.2	NA	NA	1.2945	1.2945	-0.2945	8.14689	1.10033	1.77383	694.07	356.743	BB	90	3	3	2013-11-08 21:37:01	20.0802	C:\Xcalibur\data\20131108_parkJH_amino_Q\CC18_ACN_G_20min_amino_S_1108_2	C:\Xcalibur\data\20131108_parkJH_amino_Q\AA_Q_1	D:3	10	0	0	NA	NA	1
AA_2ug_2	Std Bracket Sample		AA_2ug_2	2	1.44148	ug/mL	-0.279258	2	0.711583		NA	NA		1.16546e+06	69179.8	NA	NA	1.302	1.302	-0.302	13.5129	1.096	1.88817	475.77	-2152.49	BB	90	3	3	2013-11-09 04:51:21	19.9908	C:\Xcalibur\data\20131108_parkJH_amino_Q\CC18_ACN_G_20min_amino_S_1108_2	C:\Xcalibur\data\20131108_parkJH_amino_Q\AA_Q_1	D:3	10	0	0	NA	NA	1
AA_2ug_3	Std Bracket Sample		AA_2ug_3	2	NF	ug/mL	NF	2	NF	Not Found	NF	NA		NF	NF			NF	NF	NF	NF	NF	NF	NF	NF	NF	90	3	3	2013-11-09 10:01:44	20.0178	C:\Xcalibur\data\20131108_parkJH_amino_Q\CC18_ACN_G_20min_amino_S_1108_2	C:\Xcalibur\data\20131108_parkJH_amino_Q\AA_Q_1	D:3	10	0	0	0	0	1
AA_125P	Unknown Sample		AA_125P	NA	1.30437	ug/mL	NA	NA	NA		NA	NA		1.0546e+06	37330.7	NA	NA	1.48317	1.48317	-0.483167	4.08084	1.00283	2.22333	-2182.85	-820.559	BB	90	3	3	2013-11-08 13:41:21	20.0445	C:\Xcalibur\data\20131108_parkJH_amino_Q\CC18_ACN_G_20min_amino_S_1108_2	C:\Xcalibur\data\20131108_parkJH_amino_Q\AA_Q_1	D:1	10	0	0	NA	NA	1
AA_125P_1	Unknown Sample		AA_125P_1	NA	2.16335	ug/mL	NA	NA	NA		NA	NA		1.7491e+06	70446.5	NA	NA	1.4885	1.4885	-0.4885	15.6693	0.894	2.843	-216.796	-498.234	BB	90	3	3	2013-11-08 20:55:43	20.0418	C:\Xcalibur\data\20131108_parkJH_amino_Q\CC18_ACN_G_20min_amino_S_1108_2	C:\Xcalibur\data\20131108_parkJH_amino_Q\AA_Q_1	D:1	10	0	0	NA	NA	1
AA_125P_2	Unknown Sample		AA_125P_2	NA	2.77238	ug/mL	NA	NA	NA		NA	NA		2.24152e+06	79460.4	NA	NA	1.48833	1.48833	-0.488333	4.54906	1.10183	2.41483	4248.55	7854.99	BB	90	3	3	2013-11-09 04:10:00	20.045	C:\Xcalibur\data\20131108_parkJH_amino_Q\CC18_ACN_G_20min_amino_S_1108_2	C:\Xcalibur\data\20131108_parkJH_amino_Q\AA_Q_1	D:1	10	0	0	NA	NA	1
AA_125P_3	Unknown Sample		AA_125P_3	NA	2.27947	ug/mL	NA	NA	NA		NA	NA		1.84299e+06	72842.5	NA	NA	1.46283	1.46283	-0.462833	10.3437	1.0945	2.307	649.501	-1400.5	BB	90	3	3	2013-11-09 09:20:22	19.988	C:\Xcalibur\data\20131108_parkJH_amino_Q\CC18_ACN_G_20min_amino_S_1108_2	C:\Xcalibur\data\20131108_parkJH_amino_Q\AA_Q_1	D:1	10	0	0	NA	NA	1
AA_200ng_4_400n	Unknown Sample		AA_200ng_3	NA	NF	ug/mL	NF	NA	NF	Not Found	NF	NA		NF	NF			NF	NF	NF	NF	NF	NF	NF	NF	NF	90	3	3	2013-11-09 12:26:20	20.0312	C:\Xcalibur\data\20131108_parkJH_amino_Q\CC18_ACN_G_20min_amino_S_1108_2	C:\Xcalibur\data\20131108_parkJH_amino_Q\AA_Q_1	D:2	20	0	0	0	0	1
AA_20ug_4_40u	Unknown Sample		AA_20ug_3	NA	NF	ug/mL	NF	NA	NF	Not Found	NF	NA		NF	NF			NF	NF	NF	NF	NF	NF	NF	NF	NF	90	3	3	2013-11-09 13:07:52	20.035	C:\Xcalibur\data\20131108_parkJH_amino_Q\CC18_ACN_G_20min_amino_S_1108_2	C:\Xcalibur\data\20131108_parkJH_amino_Q\AA_Q_1	D:4	20	0	0	0	0	1
AA_2ug_4_4u	Unknown Sample		AA_2ug_3	NA	NF	ug/mL	NF	NA	NF	Not Found	NF	NA		NF	NF			NF	NF	NF	NF	NF	NF	NF	NF	NF	90	3	3	2013-11-09 12:47:12	20.0247	C:\Xcalibur\data\20131108_parkJH_amino_Q\CC18_ACN_G_20min_amino_S_1108_2	C:\Xcalibur\data\20131108_parkJH_amino_Q\AA_Q_1	D:3	20	0	0	0	0	1
b	Unknown Sample		b	NA	NF	ug/mL	NF	NA	NF	Not Found	NF	NA		NF	NF			NF	NF	NF	NF	NF	NF	NF	NF	NF	90	3	3	2013-11-08 13:20:30	19.9822	C:\Xcalibur\data\20131108_parkJH_amino_Q\CC18_ACN_G_20min_amino_S_1108_2	C:\Xcalibur\data\20131108_parkJH_amino_Q\AA_Q_1	A:1	10	0	0	0	0	1
b1	Unknown Sample		b1	NA	NF	ug/mL	NF	NA	NF	Not Found	NF	NA		NF	NF			NF	NF	NF	NF	NF	NF	NF	NF	NF	90	3	3	2013-11-08 16:06:01	20.036	C:\Xcalibur\data\20131108_parkJH_amino_Q\CC18_ACN_G_20min_amino_S_1108_2	C:\Xcalibur\data\20131108_parkJH_amino_Q\AA_Q_1	A:1	10	0	0	0	0	1
b10	Unknown Sample		b10	NA	NF	ug/mL	NF	NA	NF	Not Found	NF	NA		NF	NF			NF	NF	NF	NF	NF	NF	NF	NF	NF	90	3	3	2013-11-09 14:51:24	20.017	C:\Xcalibur\data\20131108_parkJH_amino_Q\CC18_ACN_G_20min_amino_S_1108_2	C:\Xcalibur\data\20131108_parkJH_amino_Q\AA_Q_1	A:1	10	0	0	0	0	1
b2	Unknown Sample		b2	NA	NF	ug/mL	NF	NA	NF	Not Found	NF	NA		NF	NF			NF	NF	NF	NF	NF	NF	NF	NF	NF	90	3	3	2013-11-08 20:35:03	20.036	C:\Xcalibur\data\20131108_parkJH_amino_Q\CC18_ACN_G_20min_amino_S_1108_2	C:\Xcalibur\data\20131108_parkJH_amino_Q\AA_Q_1	A:1	10	0	0	0	0	1
b3	Unknown Sample		b3	NA	NF	ug/mL	NF	NA	NF	Not Found	NF	NA		NF	NF			NF	NF	NF	NF	NF	NF	NF	NF	NF	90	3	3	2013-11-08 23:20:30	19.9902	C:\Xcalibur\data\20131108_parkJH_amino_Q\CC18_ACN_G_20min_amino_S_1108_2	C:\Xcalibur\data\20131108_parkJH_amino_Q\AA_Q_1	A:1	10	0	0	0	0	1
b4	Unknown Sample		b4	NA	NF	ug/mL	NF	NA	NF	Not Found	NF	NA		NF	NF			NF	NF	NF	NF	NF	NF	NF	NF	NF	90	3	3	2013-11-09 03:49:22	20.0207	C:\Xcalibur\data\20131108_parkJH_amino_Q\CC18_ACN_G_20min_amino_S_1108_2	C:\Xcalibur\data\20131108_parkJH_amino_Q\AA_Q_1	A:1	10	0	0	0	0	1
b5	Unknown Sample		b5	NA	NF	ug/mL	NF	NA	NF	Not Found	NF	NA		NF	NF			NF	NF	NF	NF	NF	NF	NF	NF	NF	90	3	3	2013-11-09 06:34:38	20.0325	C:\Xcalibur\data\20131108_parkJH_amino_Q\CC18_ACN_G_20min_amino_S_1108_2	C:\Xcalibur\data\20131108_parkJH_amino_Q\AA_Q_1	A:1	10	0	0	0	0	1
b6	Unknown Sample		b6	NA	NF	ug/mL	NF	NA	NF	Not Found	NF	NA		NF	NF			NF	NF	NF	NF	NF	NF	NF	NF	NF	90	3	3	2013-11-09 08:59:42	20.0335	C:\Xcalibur\data\20131108_parkJH_amino_Q\CC18_ACN_G_20min_amino_S_1108_2	C:\Xcalibur\data\20131108_parkJH_amino_Q\AA_Q_1	A:1	10	0	0	0	0	1
b7	Unknown Sample		b7	NA	NF	ug/mL	NF	NA	NF	Not Found	NF	NA		NF	NF			NF	NF	NF	NF	NF	NF	NF	NF	NF	90	3	3	2013-11-09 11:44:58	20.0398	C:\Xcalibur\data\20131108_parkJH_amino_Q\CC18_ACN_G_20min_amino_S_1108_2	C:\Xcalibur\data\20131108_parkJH_amino_Q\AA_Q_1	A:1	10	0	0	0	0	1
b8	Unknown Sample		b8	NA	NF	ug/mL	NF	NA	NF	Not Found	NF	NA		NF	NF			NF	NF	NF	NF	NF	NF	NF	NF	NF	90	3	3	2013-11-09 12:05:40	20.0373	C:\Xcalibur\data\20131108_parkJH_amino_Q\CC18_ACN_G_20min_amino_S_1108_2	C:\Xcalibur\data\20131108_parkJH_amino_Q\AA_Q_1	A:1	10	0	0	0	0	1
b9	Unknown Sample		b9	NA	NF	ug/mL	NF	NA	NF	Not Found	NF	NA		NF	NF			NF	NF	NF	NF	NF	NF	NF	NF	NF	90	3	3	2013-11-09 14:30:42	20.0372	C:\Xcalibur\data\20131108_parkJH_amino_Q\CC18_ACN_G_20min_amino_S_1108_2	C:\Xcalibur\data\20131108_parkJH_amino_Q\AA_Q_1	A:1	10	0	0	0	0	1
L-Ala_control	Unknown Sample		L-Ala_control	NA	215.404	ug/mL	NA	NA	NA	Response High	NA	NA		1.74157e+08	5.15199e+06	NA	NA	1.28217	1.28217	-0.282167	41.0803	0.898	2.84183	-31511.6	30671.7	BB	90	3	3	2013-11-09 03:28:40	20.0213	C:\Xcalibur\data\20131108_parkJH_amino_Q\CC18_ACN_G_20min_amino_S_1108_2	C:\Xcalibur\data\20131108_parkJH_amino_Q\AA_Q_1	D:31	10	0	0	NA	NA	1
L-Ala_Pin	Unknown Sample		L-Ala_Pin	NA	240.462	ug/mL	NA	NA	NA	Response High	NA	NA		1.94417e+08	5.04581e+06	NA	NA	1.4995	1.4995	-0.4995	321.594	0.897833	3.48017	2071.07	24570.9	BB	90	3	3	2013-11-09 03:08:00	19.9988	C:\Xcalibur\data\20131108_parkJH_amino_Q\CC18_ACN_G_20min_amino_S_1108_2	C:\Xcalibur\data\20131108_parkJH_amino_Q\AA_Q_1	D:30	10	0	0	NA	NA	1
L-Ala_Plane	Unknown Sample		L-Ala_Plane	NA	219.82	ug/mL	NA	NA	NA	Response High	NA	NA		1.77728e+08	5.07932e+06	NA	NA	1.35517	1.35517	-0.355167	45.6686	0.9945	2.7215	-2872.29	13381.2	BB	90	3	3	2013-11-09 02:47:23	20.0125	C:\Xcalibur\data\20131108_parkJH_amino_Q\CC18_ACN_G_20min_amino_S_1108_2	C:\Xcalibur\data\20131108_parkJH_amino_Q\AA_Q_1	D:29	10	0	0	NA	NA	1

## Sheet: Glutamic acid
Component Name		Curve Index	Weighting Index	Origin Index	Equation
Glu		Linear	Equal	Ignore	Y = 3.94888e+006+4.47865e+006*X R^2 = 0.9953
Filename	Sample Type	Sample Name	Sample ID	Exp Amt	Calc Amt	Units	%Diff	Level	%RSD-AMT	Peak Status	Response	Response Type	Equation	Area	Height	ISTD Area	ISTD Ht	RT	Rel RT	Del RT	S/N	Start Time	End Time	Start Height	End Height	Integ Code	Search Window	Threshold	Smooth	Acq Date	Duration	Exp Method	Proc Method	Vial	Inj Vol	Sample Wt	Sample Vol	ISTD Base Amt	ISTD Calc Amt	Dilution Factor	Study	Client	Laboratory	Company	Phone	Comment
AA_200ng	Std Bracket Sample		AA_200ng	0.2	-0.34797		-2.73985	0.2	0	Response Low	NA	NA	Y = 3.94888e+006+4.47865e+006*X R^2 = 0.9953	2.39044e+06	111348	NA	NA	1.37783	0.918556	0.122167	6.59886	0.982333	1.8895	-965.983	1153.68	BB	60	3	1	2013-11-08 14:02:05	19.9898	C:\Xcalibur\data\20131108_parkJH_amino_Q\CC18_ACN_G_20min_amino_S_1108_2	C:\Xcalibur\data\20131108_parkJH_amino_Q\AA_Q_1	D:2	NA	0	0	NA	NA	1
AA_200ng_1	Std Bracket Sample		AA_200ng_1	0.2	-0.351978		-2.75989	0.2	0	Response Low	NA	NA		2.37249e+06	97078.5	NA	NA	1.3965	0.931	0.1035	10.5711	0.983833	1.91167	-549.282	279.127	BB	60	3	1	2013-11-08 21:16:23	20.0043	C:\Xcalibur\data\20131108_parkJH_amino_Q\CC18_ACN_G_20min_amino_S_1108_2	C:\Xcalibur\data\20131108_parkJH_amino_Q\AA_Q_1	D:2	NA	0	0	NA	NA	1
AA_200ng_2	Std Bracket Sample		AA_200ng_2	0.2	-0.3556		-2.778	0.2	0	Response Low	NA	NA		2.35627e+06	101188	NA	NA	1.2895	0.859667	0.2105	6.42167	1.08417	1.8055	-393.338	-669.896	BB	60	3	1	2013-11-09 04:30:42	20.0338	C:\Xcalibur\data\20131108_parkJH_amino_Q\CC18_ACN_G_20min_amino_S_1108_2	C:\Xcalibur\data\20131108_parkJH_amino_Q\AA_Q_1	D:2	NA	0	0	NA	NA	1
AA_200ng_3	Std Bracket Sample		AA_200ng_3	0.2	NF		NF	0.2	NF	Not Found	NF	NA		NF	NF			NF	NF	NF	NF	NF	NF	NF	NF	NF	60	3	1	2013-11-09 09:41:00	20.0438	C:\Xcalibur\data\20131108_parkJH_amino_Q\CC18_ACN_G_20min_amino_S_1108_2	C:\Xcalibur\data\20131108_parkJH_amino_Q\AA_Q_1	D:2	NA	0	0	0	0	1
AA_20ug	Std Bracket Sample		AA_20ug	20	20.7599		0.0379961	20	0.0384331	Response High	NA	NA		9.69253e+07	3.14964e+06	NA	NA	1.35333	0.902222	0.146667	132.976	0.981333	2.8375	-7545.66	6318.9	BB	60	3	1	2013-11-08 14:43:20	20.03	C:\Xcalibur\data\20131108_parkJH_amino_Q\CC18_ACN_G_20min_amino_S_1108_2	C:\Xcalibur\data\20131108_parkJH_amino_Q\AA_Q_1	D:4	NA	0	0	NA	NA	1
AA_20ug_1	Std Bracket Sample		AA_20ug_1	20	19.8361		-0.00819661	20	0.0384331		NA	NA		9.27876e+07	3.0169e+06	NA	NA	1.39767	0.931778	0.102333	131.608	0.9835	2.83433	-1475.21	-3343.41	BB	60	3	1	2013-11-08 21:57:45	20.0167	C:\Xcalibur\data\20131108_parkJH_amino_Q\CC18_ACN_G_20min_amino_S_1108_2	C:\Xcalibur\data\20131108_parkJH_amino_Q\AA_Q_1	D:4	NA	0	0	NA	NA	1
AA_20ug_2	Std Bracket Sample		AA_20ug_2	20	19.2385		-0.0380772	20	0.0384331		NA	NA		9.01111e+07	2.97978e+06	NA	NA	1.47	0.98	0.03	206.941	0.978	2.8745	-7751.24	10457.9	BB	60	3	1	2013-11-09 05:11:57	20.0477	C:\Xcalibur\data\20131108_parkJH_amino_Q\CC18_ACN_G_20min_amino_S_1108_2	C:\Xcalibur\data\20131108_parkJH_amino_Q\AA_Q_1	D:4	NA	0	0	NA	NA	1
AA_20ug_3	Std Bracket Sample		AA_20ug_3	20	6.49957		-0.675021	20	NA	Excluded	NA	NA		3.30582e+07	1.17386e+06	NA	NA	1.44983	0.966556	0.0501667	105.673	0.982667	2.72667	-2147.16	1140.31	BB	60	3	1	2013-11-09 10:22:21	20.0133	C:\Xcalibur\data\20131108_parkJH_amino_Q\CC18_ACN_G_20min_amino_S_1108_2	C:\Xcalibur\data\20131108_parkJH_amino_Q\AA_Q_1	D:4	NA	0	0	NA	NA	1
AA_2ug	Std Bracket Sample		AA_2ug	2	2.78776		0.393879	2	0.680645		NA	NA		1.64343e+07	676017	NA	NA	1.35983	0.906556	0.140167	49.3594	0.983167	2.48017	-2328.64	2230.56	BB	60	3	1	2013-11-08 14:22:41	19.9762	C:\Xcalibur\data\20131108_parkJH_amino_Q\CC18_ACN_G_20min_amino_S_1108_2	C:\Xcalibur\data\20131108_parkJH_amino_Q\AA_Q_1	D:3	NA	0	0	NA	NA	1
AA_2ug_1	Std Bracket Sample		AA_2ug_1	2	2.80565		0.402824	2	0.680645		NA	NA		1.65144e+07	682679	NA	NA	1.3675	0.911667	0.1325	56.4992	0.980667	2.584	-8317.54	-1951.44	BB	60	3	1	2013-11-08 21:37:01	20.0802	C:\Xcalibur\data\20131108_parkJH_amino_Q\CC18_ACN_G_20min_amino_S_1108_2	C:\Xcalibur\data\20131108_parkJH_amino_Q\AA_Q_1	D:3	NA	0	0	NA	NA	1
AA_2ug_2	Std Bracket Sample		AA_2ug_2	2	2.2277		0.113849	2	0.680645		NA	NA		1.3926e+07	605666	NA	NA	1.37317	0.915444	0.126833	49.2221	0.975833	2.59117	-8887.27	1585	BB	60	3	1	2013-11-09 04:51:21	19.9908	C:\Xcalibur\data\20131108_parkJH_amino_Q\CC18_ACN_G_20min_amino_S_1108_2	C:\Xcalibur\data\20131108_parkJH_amino_Q\AA_Q_1	D:3	NA	0	0	NA	NA	1
AA_2ug_3	Std Bracket Sample		AA_2ug_3	2	NF		NF	2	NF	Not Found	NF	NA		NF	NF			NF	NF	NF	NF	NF	NF	NF	NF	NF	60	3	1	2013-11-09 10:01:44	20.0178	C:\Xcalibur\data\20131108_parkJH_amino_Q\CC18_ACN_G_20min_amino_S_1108_2	C:\Xcalibur\data\20131108_parkJH_amino_Q\AA_Q_1	D:3	NA	0	0	0	0	1
AA_125P	Unknown Sample		AA_125P	NA	12.8541		NA	NA	NA		NA	NA		6.1518e+07	2.87111e+06	NA	NA	1.0865	0.724333	0.4135	102.97	0.8805	2.96567	-6323.6	-3788.76	BB	60	3	1	2013-11-08 13:41:21	20.0445	C:\Xcalibur\data\20131108_parkJH_amino_Q\CC18_ACN_G_20min_amino_S_1108_2	C:\Xcalibur\data\20131108_parkJH_amino_Q\AA_Q_1	D:1	NA	0	0	NA	NA	1
AA_125P_1	Unknown Sample		AA_125P_1	NA	NF		NF	NA	NF	Not Found	NF	NA		NF	NF			NF	NF	NF	NF	NF	NF	NF	NF	NF	60	3	1	2013-11-08 20:55:43	20.0418	C:\Xcalibur\data\20131108_parkJH_amino_Q\CC18_ACN_G_20min_amino_S_1108_2	C:\Xcalibur\data\20131108_parkJH_amino_Q\AA_Q_1	D:1	NA	0	0	0	0	1
AA_125P_2	Unknown Sample		AA_125P_2	NA	5.45721		NA	NA	NA		NA	NA		2.83898e+07	3.36953e+06	NA	NA	1.09183	0.727889	0.408167	3.63112	0.9885	1.36717	-47016.5	52886.6	BB	60	3	1	2013-11-09 04:10:00	20.045	C:\Xcalibur\data\20131108_parkJH_amino_Q\CC18_ACN_G_20min_amino_S_1108_2	C:\Xcalibur\data\20131108_parkJH_amino_Q\AA_Q_1	D:1	NA	0	0	NA	NA	1
AA_125P_3	Unknown Sample		AA_125P_3	NA	5.24469		NA	NA	NA		NA	NA		2.7438e+07	2.81347e+06	NA	NA	1.085	0.723333	0.415	3.01799	0.981333	1.34283	-67434.8	4298.55	BB	60	3	1	2013-11-09 09:20:22	19.988	C:\Xcalibur\data\20131108_parkJH_amino_Q\CC18_ACN_G_20min_amino_S_1108_2	C:\Xcalibur\data\20131108_parkJH_amino_Q\AA_Q_1	D:1	NA	0	0	NA	NA	1
AA_200ng_4_400n	Unknown Sample		AA_200ng_3	NA	NF		NF	NA	NF	Not Found	NF	NA		NF	NF			NF	NF	NF	NF	NF	NF	NF	NF	NF	60	3	1	2013-11-09 12:26:20	20.0312	C:\Xcalibur\data\20131108_parkJH_amino_Q\CC18_ACN_G_20min_amino_S_1108_2	C:\Xcalibur\data\20131108_parkJH_amino_Q\AA_Q_1	D:2	NA	0	0	0	0	1
AA_20ug_4_40u	Unknown Sample		AA_20ug_3	NA	NF		NF	NA	NF	Not Found	NF	NA		NF	NF			NF	NF	NF	NF	NF	NF	NF	NF	NF	60	3	1	2013-11-09 13:07:52	20.035	C:\Xcalibur\data\20131108_parkJH_amino_Q\CC18_ACN_G_20min_amino_S_1108_2	C:\Xcalibur\data\20131108_parkJH_amino_Q\AA_Q_1	D:4	NA	0	0	0	0	1
AA_2ug_4_4u	Unknown Sample		AA_2ug_3	NA	NF		NF	NA	NF	Not Found	NF	NA		NF	NF			NF	NF	NF	NF	NF	NF	NF	NF	NF	60	3	1	2013-11-09 12:47:12	20.0247	C:\Xcalibur\data\20131108_parkJH_amino_Q\CC18_ACN_G_20min_amino_S_1108_2	C:\Xcalibur\data\20131108_parkJH_amino_Q\AA_Q_1	D:3	NA	0	0	0	0	1
b	Unknown Sample		b	NA	NF		NF	NA	NF	Not Found	NF	NA		NF	NF			NF	NF	NF	NF	NF	NF	NF	NF	NF	60	3	1	2013-11-08 13:20:30	19.9822	C:\Xcalibur\data\20131108_parkJH_amino_Q\CC18_ACN_G_20min_amino_S_1108_2	C:\Xcalibur\data\20131108_parkJH_amino_Q\AA_Q_1	A:1	NA	0	0	0	0	1
b1	Unknown Sample		b1	NA	NF		NF	NA	NF	Not Found	NF	NA		NF	NF			NF	NF	NF	NF	NF	NF	NF	NF	NF	60	3	1	2013-11-08 16:06:01	20.036	C:\Xcalibur\data\20131108_parkJH_amino_Q\CC18_ACN_G_20min_amino_S_1108_2	C:\Xcalibur\data\20131108_parkJH_amino_Q\AA_Q_1	A:1	NA	0	0	0	0	1
b10	Unknown Sample		b10	NA	NF		NF	NA	NF	Not Found	NF	NA		NF	NF			NF	NF	NF	NF	NF	NF	NF	NF	NF	60	3	1	2013-11-09 14:51:24	20.017	C:\Xcalibur\data\20131108_parkJH_amino_Q\CC18_ACN_G_20min_amino_S_1108_2	C:\Xcalibur\data\20131108_parkJH_amino_Q\AA_Q_1	A:1	NA	0	0	0	0	1
b2	Unknown Sample		b2	NA	NF		NF	NA	NF	Not Found	NF	NA		NF	NF			NF	NF	NF	NF	NF	NF	NF	NF	NF	60	3	1	2013-11-08 20:35:03	20.036	C:\Xcalibur\data\20131108_parkJH_amino_Q\CC18_ACN_G_20min_amino_S_1108_2	C:\Xcalibur\data\20131108_parkJH_amino_Q\AA_Q_1	A:1	NA	0	0	0	0	1
b3	Unknown Sample		b3	NA	NF		NF	NA	NF	Not Found	NF	NA		NF	NF			NF	NF	NF	NF	NF	NF	NF	NF	NF	60	3	1	2013-11-08 23:20:30	19.9902	C:\Xcalibur\data\20131108_parkJH_amino_Q\CC18_ACN_G_20min_amino_S_1108_2	C:\Xcalibur\data\20131108_parkJH_amino_Q\AA_Q_1	A:1	NA	0	0	0	0	1
b4	Unknown Sample		b4	NA	NF		NF	NA	NF	Not Found	NF	NA		NF	NF			NF	NF	NF	NF	NF	NF	NF	NF	NF	60	3	1	2013-11-09 03:49:22	20.0207	C:\Xcalibur\data\20131108_parkJH_amino_Q\CC18_ACN_G_20min_amino_S_1108_2	C:\Xcalibur\data\20131108_parkJH_amino_Q\AA_Q_1	A:1	NA	0	0	0	0	1
b5	Unknown Sample		b5	NA	NF		NF	NA	NF	Not Found	NF	NA		NF	NF			NF	NF	NF	NF	NF	NF	NF	NF	NF	60	3	1	2013-11-09 06:34:38	20.0325	C:\Xcalibur\data\20131108_parkJH_amino_Q\CC18_ACN_G_20min_amino_S_1108_2	C:\Xcalibur\data\20131108_parkJH_amino_Q\AA_Q_1	A:1	NA	0	0	0	0	1
b6	Unknown Sample		b6	NA	NF		NF	NA	NF	Not Found	NF	NA		NF	NF			NF	NF	NF	NF	NF	NF	NF	NF	NF	60	3	1	2013-11-09 08:59:42	20.0335	C:\Xcalibur\data\20131108_parkJH_amino_Q\CC18_ACN_G_20min_amino_S_1108_2	C:\Xcalibur\data\20131108_parkJH_amino_Q\AA_Q_1	A:1	NA	0	0	0	0	1
b7	Unknown Sample		b7	NA	NF		NF	NA	NF	Not Found	NF	NA		NF	NF			NF	NF	NF	NF	NF	NF	NF	NF	NF	60	3	1	2013-11-09 11:44:58	20.0398	C:\Xcalibur\data\20131108_parkJH_amino_Q\CC18_ACN_G_20min_amino_S_1108_2	C:\Xcalibur\data\20131108_parkJH_amino_Q\AA_Q_1	A:1	NA	0	0	0	0	1
b8	Unknown Sample		b8	NA	NF		NF	NA	NF	Not Found	NF	NA		NF	NF			NF	NF	NF	NF	NF	NF	NF	NF	NF	60	3	1	2013-11-09 12:05:40	20.0373	C:\Xcalibur\data\20131108_parkJH_amino_Q\CC18_ACN_G_20min_amino_S_1108_2	C:\Xcalibur\data\20131108_parkJH_amino_Q\AA_Q_1	A:1	NA	0	0	0	0	1
b9	Unknown Sample		b9	NA	NF		NF	NA	NF	Not Found	NF	NA		NF	NF			NF	NF	NF	NF	NF	NF	NF	NF	NF	60	3	1	2013-11-09 14:30:42	20.0372	C:\Xcalibur\data\20131108_parkJH_amino_Q\CC18_ACN_G_20min_amino_S_1108_2	C:\Xcalibur\data\20131108_parkJH_amino_Q\AA_Q_1	A:1	NA	0	0	0	0	1
L-Glu_control	Unknown Sample		L_Glu_control	NA	125.905		NA	NA	NA	Response High	NA	NA		5.67833e+08	2.29437e+07	NA	NA	1.37	0.913333	0.13	432.705	0.985833	2.639	-7711.27	98353.8	BB	60	3	1	2013-11-08 20:14:21	20.01	C:\Xcalibur\data\20131108_parkJH_amino_Q\CC18_ACN_G_20min_amino_S_1108_2	C:\Xcalibur\data\20131108_parkJH_amino_Q\AA_Q_1	D:19	NA	0	0	NA	NA	1
L-Glu_Pin	Unknown Sample		L_Glu_Pin	NA	113.083		NA	NA	NA	Response High	NA	NA		5.10408e+08	2.11476e+07	NA	NA	1.36433	0.909556	0.135667	264.213	0.9785	2.522	-21173.8	85284.6	BB	60	3	1	2013-11-08 19:53:31	20.0167	C:\Xcalibur\data\20131108_parkJH_amino_Q\CC18_ACN_G_20min_amino_S_1108_2	C:\Xcalibur\data\20131108_parkJH_amino_Q\AA_Q_1	D:18	NA	0	0	NA	NA	1
L-Glu_Plane	Unknown Sample		L_Glu_Plane	NA	109.904		NA	NA	NA	Response High	NA	NA		4.96172e+08	1.96657e+07	NA	NA	1.45383	0.969222	0.0461667	1424.21	0.980667	2.74583	8206.1	88602.7	BB	60	3	1	2013-11-08 19:32:49	20.0318	C:\Xcalibur\data\20131108_parkJH_amino_Q\CC18_ACN_G_20min_amino_S_1108_2	C:\Xcalibur\data\20131108_parkJH_amino_Q\AA_Q_1	D:17	NA	0	0	NA	NA	1

## Sheet: Asparagine
Component Name		Curve Index	Weighting Index	Origin Index	Equation
Asn		Linear	Equal	Ignore	Y = 2.13026e+006+3.03477e+006*X R^2 = 0.9967
Filename	Sample Type	Sample Name	Sample ID	Exp Amt	Calc Amt	Units	%Diff	Level	%RSD-AMT	Peak Status	Response	Response Type	Equation	Area	Height	ISTD Area	ISTD Ht	RT	Rel RT	Del RT	S/N	Start Time	End Time	Start Height	End Height	Integ Code	Search Window	Threshold	Smooth	Acq Date	Duration	Exp Method	Proc Method	Vial	Inj Vol	Sample Wt	Sample Vol	ISTD Base Amt	ISTD Calc Amt	Dilution Factor	Study	Client	Laboratory	Company	Phone	Comment
AA_200ng	Std Bracket Sample		AA_200ng	0.2	-0.261551		-2.30775	0.2	0	Response Low	NA	NA	Y = 2.13026e+006+3.03477e+006*X R^2 = 0.9967	1.33652e+06	55413.6	NA	NA	1.35967	0.906444	0.140333	17.4303	0.963	2.28383	-1484.51	-815.663	BB	60	3	1	2013-11-08 14:02:05	19.9898	C:\Xcalibur\data\20131108_parkJH_amino_Q\CC18_ACN_G_20min_amino_S_1108_2	C:\Xcalibur\data\20131108_parkJH_amino_Q\AA_Q_1	D:2	NA	0	0	NA	NA	1
AA_200ng_1	Std Bracket Sample		AA_200ng_1	0.2	-0.290748		-2.45374	0.2	0	Response Low	NA	NA		1.24791e+06	61271.3	NA	NA	1.37717	0.918111	0.122833	13.5296	1.06817	2.2035	1107.09	-1326.7	BB	60	3	1	2013-11-08 21:16:23	20.0043	C:\Xcalibur\data\20131108_parkJH_amino_Q\CC18_ACN_G_20min_amino_S_1108_2	C:\Xcalibur\data\20131108_parkJH_amino_Q\AA_Q_1	D:2	NA	0	0	NA	NA	1
AA_200ng_2	Std Bracket Sample		AA_200ng_2	0.2	-0.223799		-2.11899	0.2	0	Response Low	NA	NA		1.45109e+06	74154.9	NA	NA	1.27233	0.848222	0.227667	14.824	0.961333	1.9935	-1065.99	-1202.33	BB	60	3	1	2013-11-09 04:30:42	20.0338	C:\Xcalibur\data\20131108_parkJH_amino_Q\CC18_ACN_G_20min_amino_S_1108_2	C:\Xcalibur\data\20131108_parkJH_amino_Q\AA_Q_1	D:2	NA	0	0	NA	NA	1
AA_200ng_3	Std Bracket Sample		AA_200ng_3	0.2	NF		NF	0.2	NF	Not Found	NF	NA		NF	NF			NF	NF	NF	NF	NF	NF	NF	NF	NF	60	3	1	2013-11-09 09:41:00	20.0438	C:\Xcalibur\data\20131108_parkJH_amino_Q\CC18_ACN_G_20min_amino_S_1108_2	C:\Xcalibur\data\20131108_parkJH_amino_Q\AA_Q_1	D:2	NA	0	0	0	0	1
AA_20ug	Std Bracket Sample		AA_20ug	20	20.2216		0.0110823	20	0.028291	Response High	NA	NA		6.34982e+07	2.27481e+06	NA	NA	1.45933	0.972889	0.0406667	630.716	0.962	3.02567	-1614.48	7107.78	BB	60	3	1	2013-11-08 14:43:20	20.03	C:\Xcalibur\data\20131108_parkJH_amino_Q\CC18_ACN_G_20min_amino_S_1108_2	C:\Xcalibur\data\20131108_parkJH_amino_Q\AA_Q_1	D:4	NA	0	0	NA	NA	1
AA_20ug_1	Std Bracket Sample		AA_20ug_1	20	20.3352		0.0167583	20	0.028291	Response High	NA	NA		6.38427e+07	2.24377e+06	NA	NA	1.39	0.926667	0.11	372.353	0.964333	3.02233	149.128	1391.1	BB	60	3	1	2013-11-08 21:57:45	20.0167	C:\Xcalibur\data\20131108_parkJH_amino_Q\CC18_ACN_G_20min_amino_S_1108_2	C:\Xcalibur\data\20131108_parkJH_amino_Q\AA_Q_1	D:4	NA	0	0	NA	NA	1
AA_20ug_2	Std Bracket Sample		AA_20ug_2	20	19.3056		-0.0347211	20	0.028291		NA	NA		6.07182e+07	2.17671e+06	NA	NA	1.40417	0.936111	0.0958333	595.062	0.958833	2.95733	322.498	5290.76	BB	60	3	1	2013-11-09 05:11:57	20.0477	C:\Xcalibur\data\20131108_parkJH_amino_Q\CC18_ACN_G_20min_amino_S_1108_2	C:\Xcalibur\data\20131108_parkJH_amino_Q\AA_Q_1	D:4	NA	0	0	NA	NA	1
AA_20ug_3	Std Bracket Sample		AA_20ug_3	20	6.08752		-0.695624	20	NA	Excluded	NA	NA		2.06045e+07	741881	NA	NA	1.354	0.902667	0.146	226.875	1.067	2.811	998.027	372.955	BB	60	3	1	2013-11-09 10:22:21	20.0133	C:\Xcalibur\data\20131108_parkJH_amino_Q\CC18_ACN_G_20min_amino_S_1108_2	C:\Xcalibur\data\20131108_parkJH_amino_Q\AA_Q_1	D:4	NA	0	0	NA	NA	1
AA_2ug	Std Bracket Sample		AA_2ug	2	2.66031		0.330153	2	0.690448		NA	NA		1.02037e+07	421894	NA	NA	1.3475	0.898333	0.1525	59.9548	0.964	2.56417	-2372.91	1630.73	BB	60	3	1	2013-11-08 14:22:41	19.9762	C:\Xcalibur\data\20131108_parkJH_amino_Q\CC18_ACN_G_20min_amino_S_1108_2	C:\Xcalibur\data\20131108_parkJH_amino_Q\AA_Q_1	D:3	NA	0	0	NA	NA	1
AA_2ug_1	Std Bracket Sample		AA_2ug_1	2	2.81738		0.408689	2	0.690448		NA	NA		1.06803e+07	411515	NA	NA	1.34817	0.898778	0.151833	134.356	0.961333	2.56467	682.304	1988.45	BB	60	3	1	2013-11-08 21:37:01	20.0802	C:\Xcalibur\data\20131108_parkJH_amino_Q\CC18_ACN_G_20min_amino_S_1108_2	C:\Xcalibur\data\20131108_parkJH_amino_Q\AA_Q_1	D:3	NA	0	0	NA	NA	1
AA_2ug_2	Std Bracket Sample		AA_2ug_2	2	2.03602		0.0180119	2	0.690448		NA	NA		8.30912e+06	321349	NA	NA	1.35467	0.903111	0.145333	53.856	0.9565	2.468	-1187.59	888.866	BB	60	3	1	2013-11-09 04:51:21	19.9908	C:\Xcalibur\data\20131108_parkJH_amino_Q\CC18_ACN_G_20min_amino_S_1108_2	C:\Xcalibur\data\20131108_parkJH_amino_Q\AA_Q_1	D:3	NA	0	0	NA	NA	1
AA_2ug_3	Std Bracket Sample		AA_2ug_3	2	NF		NF	2	NF	Not Found	NF	NA		NF	NF			NF	NF	NF	NF	NF	NF	NF	NF	NF	60	3	1	2013-11-09 10:01:44	20.0178	C:\Xcalibur\data\20131108_parkJH_amino_Q\CC18_ACN_G_20min_amino_S_1108_2	C:\Xcalibur\data\20131108_parkJH_amino_Q\AA_Q_1	D:3	NA	0	0	0	0	1
AA_125P	Unknown Sample		AA_125P	NA	NF		NF	NA	NF	Not Found	NF	NA		NF	NF			NF	NF	NF	NF	NF	NF	NF	NF	NF	60	3	1	2013-11-08 13:41:21	20.0445	C:\Xcalibur\data\20131108_parkJH_amino_Q\CC18_ACN_G_20min_amino_S_1108_2	C:\Xcalibur\data\20131108_parkJH_amino_Q\AA_Q_1	D:1	NA	0	0	0	0	1
AA_125P_1	Unknown Sample		AA_125P_1	NA	11.2858		NA	NA	NA		NA	NA		3.63799e+07	1.46528e+06	NA	NA	1.99633	1.33089	-0.496333	178.123	1.44983	2.90633	2076.31	-293.9	BB	60	3	1	2013-11-08 20:55:43	20.0418	C:\Xcalibur\data\20131108_parkJH_amino_Q\CC18_ACN_G_20min_amino_S_1108_2	C:\Xcalibur\data\20131108_parkJH_amino_Q\AA_Q_1	D:1	NA	0	0	NA	NA	1
AA_125P_2	Unknown Sample		AA_125P_2	NA	NF		NF	NA	NF	Not Found	NF	NA		NF	NF			NF	NF	NF	NF	NF	NF	NF	NF	NF	60	3	1	2013-11-09 04:10:00	20.045	C:\Xcalibur\data\20131108_parkJH_amino_Q\CC18_ACN_G_20min_amino_S_1108_2	C:\Xcalibur\data\20131108_parkJH_amino_Q\AA_Q_1	D:1	NA	0	0	0	0	1
AA_125P_3	Unknown Sample		AA_125P_3	NA	11.6675		NA	NA	NA		NA	NA		3.75384e+07	1.40373e+06	NA	NA	1.954	1.30267	-0.454	275.931	1.4275	3.01317	-2497.85	4638.72	BB	60	3	1	2013-11-09 09:20:22	19.988	C:\Xcalibur\data\20131108_parkJH_amino_Q\CC18_ACN_G_20min_amino_S_1108_2	C:\Xcalibur\data\20131108_parkJH_amino_Q\AA_Q_1	D:1	NA	0	0	NA	NA	1
AA_200ng_4_400n	Unknown Sample		AA_200ng_3	NA	NF		NF	NA	NF	Not Found	NF	NA		NF	NF			NF	NF	NF	NF	NF	NF	NF	NF	NF	60	3	1	2013-11-09 12:26:20	20.0312	C:\Xcalibur\data\20131108_parkJH_amino_Q\CC18_ACN_G_20min_amino_S_1108_2	C:\Xcalibur\data\20131108_parkJH_amino_Q\AA_Q_1	D:2	NA	0	0	0	0	1
AA_20ug_4_40u	Unknown Sample		AA_20ug_3	NA	NF		NF	NA	NF	Not Found	NF	NA		NF	NF			NF	NF	NF	NF	NF	NF	NF	NF	NF	60	3	1	2013-11-09 13:07:52	20.035	C:\Xcalibur\data\20131108_parkJH_amino_Q\CC18_ACN_G_20min_amino_S_1108_2	C:\Xcalibur\data\20131108_parkJH_amino_Q\AA_Q_1	D:4	NA	0	0	0	0	1
AA_2ug_4_4u	Unknown Sample		AA_2ug_3	NA	NF		NF	NA	NF	Not Found	NF	NA		NF	NF			NF	NF	NF	NF	NF	NF	NF	NF	NF	60	3	1	2013-11-09 12:47:12	20.0247	C:\Xcalibur\data\20131108_parkJH_amino_Q\CC18_ACN_G_20min_amino_S_1108_2	C:\Xcalibur\data\20131108_parkJH_amino_Q\AA_Q_1	D:3	NA	0	0	0	0	1
b	Unknown Sample		b	NA	NF		NF	NA	NF	Not Found	NF	NA		NF	NF			NF	NF	NF	NF	NF	NF	NF	NF	NF	60	3	1	2013-11-08 13:20:30	19.9822	C:\Xcalibur\data\20131108_parkJH_amino_Q\CC18_ACN_G_20min_amino_S_1108_2	C:\Xcalibur\data\20131108_parkJH_amino_Q\AA_Q_1	A:1	NA	0	0	0	0	1
b1	Unknown Sample		b1	NA	NF		NF	NA	NF	Not Found	NF	NA		NF	NF			NF	NF	NF	NF	NF	NF	NF	NF	NF	60	3	1	2013-11-08 16:06:01	20.036	C:\Xcalibur\data\20131108_parkJH_amino_Q\CC18_ACN_G_20min_amino_S_1108_2	C:\Xcalibur\data\20131108_parkJH_amino_Q\AA_Q_1	A:1	NA	0	0	0	0	1
b10	Unknown Sample		b10	NA	NF		NF	NA	NF	Not Found	NF	NA		NF	NF			NF	NF	NF	NF	NF	NF	NF	NF	NF	60	3	1	2013-11-09 14:51:24	20.017	C:\Xcalibur\data\20131108_parkJH_amino_Q\CC18_ACN_G_20min_amino_S_1108_2	C:\Xcalibur\data\20131108_parkJH_amino_Q\AA_Q_1	A:1	NA	0	0	0	0	1
b2	Unknown Sample		b2	NA	NF		NF	NA	NF	Not Found	NF	NA		NF	NF			NF	NF	NF	NF	NF	NF	NF	NF	NF	60	3	1	2013-11-08 20:35:03	20.036	C:\Xcalibur\data\20131108_parkJH_amino_Q\CC18_ACN_G_20min_amino_S_1108_2	C:\Xcalibur\data\20131108_parkJH_amino_Q\AA_Q_1	A:1	NA	0	0	0	0	1
b3	Unknown Sample		b3	NA	NF		NF	NA	NF	Not Found	NF	NA		NF	NF			NF	NF	NF	NF	NF	NF	NF	NF	NF	60	3	1	2013-11-08 23:20:30	19.9902	C:\Xcalibur\data\20131108_parkJH_amino_Q\CC18_ACN_G_20min_amino_S_1108_2	C:\Xcalibur\data\20131108_parkJH_amino_Q\AA_Q_1	A:1	NA	0	0	0	0	1
b4	Unknown Sample		b4	NA	NF		NF	NA	NF	Not Found	NF	NA		NF	NF			NF	NF	NF	NF	NF	NF	NF	NF	NF	60	3	1	2013-11-09 03:49:22	20.0207	C:\Xcalibur\data\20131108_parkJH_amino_Q\CC18_ACN_G_20min_amino_S_1108_2	C:\Xcalibur\data\20131108_parkJH_amino_Q\AA_Q_1	A:1	NA	0	0	0	0	1
b5	Unknown Sample		b5	NA	NF		NF	NA	NF	Not Found	NF	NA		NF	NF			NF	NF	NF	NF	NF	NF	NF	NF	NF	60	3	1	2013-11-09 06:34:38	20.0325	C:\Xcalibur\data\20131108_parkJH_amino_Q\CC18_ACN_G_20min_amino_S_1108_2	C:\Xcalibur\data\20131108_parkJH_amino_Q\AA_Q_1	A:1	NA	0	0	0	0	1
b6	Unknown Sample		b6	NA	NF		NF	NA	NF	Not Found	NF	NA		NF	NF			NF	NF	NF	NF	NF	NF	NF	NF	NF	60	3	1	2013-11-09 08:59:42	20.0335	C:\Xcalibur\data\20131108_parkJH_amino_Q\CC18_ACN_G_20min_amino_S_1108_2	C:\Xcalibur\data\20131108_parkJH_amino_Q\AA_Q_1	A:1	NA	0	0	0	0	1
b7	Unknown Sample		b7	NA	NF		NF	NA	NF	Not Found	NF	NA		NF	NF			NF	NF	NF	NF	NF	NF	NF	NF	NF	60	3	1	2013-11-09 11:44:58	20.0398	C:\Xcalibur\data\20131108_parkJH_amino_Q\CC18_ACN_G_20min_amino_S_1108_2	C:\Xcalibur\data\20131108_parkJH_amino_Q\AA_Q_1	A:1	NA	0	0	0	0	1
b8	Unknown Sample		b8	NA	NF		NF	NA	NF	Not Found	NF	NA		NF	NF			NF	NF	NF	NF	NF	NF	NF	NF	NF	60	3	1	2013-11-09 12:05:40	20.0373	C:\Xcalibur\data\20131108_parkJH_amino_Q\CC18_ACN_G_20min_amino_S_1108_2	C:\Xcalibur\data\20131108_parkJH_amino_Q\AA_Q_1	A:1	NA	0	0	0	0	1
b9	Unknown Sample		b9	NA	NF		NF	NA	NF	Not Found	NF	NA		NF	NF			NF	NF	NF	NF	NF	NF	NF	NF	NF	60	3	1	2013-11-09 14:30:42	20.0372	C:\Xcalibur\data\20131108_parkJH_amino_Q\CC18_ACN_G_20min_amino_S_1108_2	C:\Xcalibur\data\20131108_parkJH_amino_Q\AA_Q_1	A:1	NA	0	0	0	0	1
L-Asn_control	Unknown Sample		L-Asn_control	NA	142.092		NA	NA	NA	Response High	NA	NA		4.33346e+08	1.67199e+07	NA	NA	1.33883	0.892556	0.161167	143.525	0.963167	2.76833	-28940.3	21333	BB	60	3	1	2013-11-09 01:24:46	20.0387	C:\Xcalibur\data\20131108_parkJH_amino_Q\CC18_ACN_G_20min_amino_S_1108_2	C:\Xcalibur\data\20131108_parkJH_amino_Q\AA_Q_1	D:25	NA	0	0	NA	NA	1
L-Asn_Pin	Unknown Sample		L-Asn_Pin	NA	125.98		NA	NA	NA	Response High	NA	NA		3.84451e+08	1.4693e+07	NA	NA	1.343	0.895333	0.157	1476.82	0.959833	2.97767	336.202	72332.2	BB	60	3	1	2013-11-09 01:03:55	20.065	C:\Xcalibur\data\20131108_parkJH_amino_Q\CC18_ACN_G_20min_amino_S_1108_2	C:\Xcalibur\data\20131108_parkJH_amino_Q\AA_Q_1	D:24	NA	0	0	NA	NA	1
L-Asn_Plane	Unknown Sample		L-Asn_Plane	NA	130.219		NA	NA	NA	Response High	NA	NA		3.97313e+08	1.59231e+07	NA	NA	1.3405	0.893667	0.1595	2182.68	0.967	3.08483	-6512.94	60969.9	BB	60	3	1	2013-11-09 00:43:11	20.074	C:\Xcalibur\data\20131108_parkJH_amino_Q\CC18_ACN_G_20min_amino_S_1108_2	C:\Xcalibur\data\20131108_parkJH_amino_Q\AA_Q_1	D:23	NA	0	0	NA	NA	1

## Sheet: Glysine
Component Name		Curve Index	Weighting Index	Origin Index	Equation
Gly		Linear	Equal	Force	Y = 41011.8*X R^2 = 0.9694
Filename	Sample Type	Sample Name	Sample ID	Exp Amt	Calc Amt	Units	%Diff	Level	%RSD-AMT	Peak Status	Response	Response Type	Equation	Area	Height	ISTD Area	ISTD Ht	RT	Rel RT	Del RT	S/N	Start Time	End Time	Start Height	End Height	Integ Code	Search Window	Threshold	Smooth	Acq Date	Duration	Exp Method	Proc Method	Vial	Inj Vol	Sample Wt	Sample Vol	ISTD Base Amt	ISTD Calc Amt	Dilution Factor	Study	Client	Laboratory	Company	Phone	Comment
Gly_200ng	Std Bracket Sample		Gly_200ng	0.2	NF	ug/ml	NF	0.2	NF	Not Found	NF	NA	Y = 41011.8*X R^2 = 0.9694	NF	NF			NF	NF	NF	NF	NF	NF	NF	NF	NF	60	3	3	2013-11-08 15:04:02	20.037	C:\Xcalibur\data\20131108_parkJH_amino_Q\CC18_ACN_G_20min_amino_S_1108_2	C:\Xcalibur\data\20131108_parkJH_amino_Q\AA_GLY_Q_1	D:5	10	0	0	0	0	1
Gly_200ng_1	Std Bracket Sample		Gly_200ng_1	0.2	2.04011	ug/ml	9.20056	0.2	0.673671		NA	NA		83668.7	8559.54	NA	NA	1.251	1.251	-0.251	INF	1.15017	1.457	340.771	1473.11	MB	60	3	3	2013-11-08 22:18:33	20.006	C:\Xcalibur\data\20131108_parkJH_amino_Q\CC18_ACN_G_20min_amino_S_1108_2	C:\Xcalibur\data\20131108_parkJH_amino_Q\AA_GLY_Q_1	D:5	10	0	0	NA	NA	1
Gly_200ng_2	Std Bracket Sample		Gly_200ng_2	0.2	2.42411	ug/ml	11.1206	0.2	0.673671		NA	NA		99417.2	6867.67	NA	NA	1.35983	1.35983	-0.359833	INF	1.04917	1.4635	26.5799	1391.63	BM	60	3	3	2013-11-09 05:32:41	20.0197	C:\Xcalibur\data\20131108_parkJH_amino_Q\CC18_ACN_G_20min_amino_S_1108_2	C:\Xcalibur\data\20131108_parkJH_amino_Q\AA_GLY_Q_1	D:5	10	0	0	NA	NA	1
Gly_200ng_3	Std Bracket Sample		Gly_200ng_3	0.2	2.15963	ug/ml	9.79817	0.2	0.673671		NA	NA		88570.5	6511.59	NA	NA	1.26083	1.26083	-0.260833	INF	1.05367	1.77817	0	0	BB	60	3	3	2013-11-09 10:43:01	20.0577	C:\Xcalibur\data\20131108_parkJH_amino_Q\CC18_ACN_G_20min_amino_S_1108_2	C:\Xcalibur\data\20131108_parkJH_amino_Q\AA_GLY_Q_1	D:5	10	0	0	NA	NA	1
Gly_20ug	Std Bracket Sample		Gly_20ug	20	21.5301	ug/ml	0.0765039	20	0.0934888	Response High	NA	NA		882987	49836.4	NA	NA	1.2575	1.2575	-0.2575	INF	1.05017	1.86567	34.4628	10.9587	MB	60	3	3	2013-11-08 15:45:21	20.0215	C:\Xcalibur\data\20131108_parkJH_amino_Q\CC18_ACN_G_20min_amino_S_1108_2	C:\Xcalibur\data\20131108_parkJH_amino_Q\AA_GLY_Q_1	D:7	10	0	0	NA	NA	1
Gly_20ug_1	Std Bracket Sample		Gly_20ug_1	20	21.3277	ug/ml	0.0663851	20	0.0934888	Response High	NA	NA		874688	40082.3	NA	NA	1.36133	1.36133	-0.361333	INF	0.948833	2.1645	0	90.0455	BB	60	3	3	2013-11-08 22:59:52	20.0007	C:\Xcalibur\data\20131108_parkJH_amino_Q\CC18_ACN_G_20min_amino_S_1108_2	C:\Xcalibur\data\20131108_parkJH_amino_Q\AA_GLY_Q_1	D:7	10	0	0	NA	NA	1
Gly_20ug_2	Std Bracket Sample		Gly_20ug_2	20	17.5673	ug/ml	-0.121635	20	0.0934888		NA	NA		720467	31702.4	NA	NA	1.358	1.358	-0.358	INF	0.9455	2.17967	0	69.3636	BB	60	3	3	2013-11-09 06:14:00	20.0217	C:\Xcalibur\data\20131108_parkJH_amino_Q\CC18_ACN_G_20min_amino_S_1108_2	C:\Xcalibur\data\20131108_parkJH_amino_Q\AA_GLY_Q_1	D:7	10	0	0	NA	NA	1
Gly_20ug_3	Std Bracket Sample		Gly_20ug_3	20	19.3517	ug/ml	-0.0324142	20	0.0934888		NA	NA		793649	36494.5	NA	NA	1.35967	1.35967	-0.359667	INF	0.842833	2.07483	53.5909	94.9545	BB	60	3	3	2013-11-09 11:24:20	20.0178	C:\Xcalibur\data\20131108_parkJH_amino_Q\CC18_ACN_G_20min_amino_S_1108_2	C:\Xcalibur\data\20131108_parkJH_amino_Q\AA_GLY_Q_1	D:7	10	0	0	NA	NA	1
Gly_2ug	Std Bracket Sample		Gly_2ug	2	1.75862	ug/ml	-0.12069	2	0.270406		NA	NA		72124.2	4241.68	NA	NA	1.35667	1.35667	-0.356667	INF	1.04583	1.87333	0	0	BB	60	3	3	2013-11-08 15:24:42	20.0195	C:\Xcalibur\data\20131108_parkJH_amino_Q\CC18_ACN_G_20min_amino_S_1108_2	C:\Xcalibur\data\20131108_parkJH_amino_Q\AA_GLY_Q_1	D:6	10	0	0	NA	NA	1
Gly_2ug_1	Std Bracket Sample		Gly_2ug_1	2	3.19554	ug/ml	0.59777	2	0.270406		NA	NA		131055	7923.18	NA	NA	1.34967	1.34967	-0.349667	INF	0.836333	1.655	0	0	BB	60	3	3	2013-11-08 22:39:13	20.0237	C:\Xcalibur\data\20131108_parkJH_amino_Q\CC18_ACN_G_20min_amino_S_1108_2	C:\Xcalibur\data\20131108_parkJH_amino_Q\AA_GLY_Q_1	D:6	10	0	0	NA	NA	1
Gly_2ug_2	Std Bracket Sample		Gly_2ug_2	2	2.66903	ug/ml	0.334513	2	0.270406		NA	NA		109462	8150.17	NA	NA	1.36017	1.36017	-0.360167	INF	0.947167	1.6705	0	94.4909	BM	60	3	3	2013-11-09 05:53:18	20.0193	C:\Xcalibur\data\20131108_parkJH_amino_Q\CC18_ACN_G_20min_amino_S_1108_2	C:\Xcalibur\data\20131108_parkJH_amino_Q\AA_GLY_Q_1	D:6	10	0	0	NA	NA	1
Gly_2ug_3	Std Bracket Sample		Gly_2ug_3	2	2.00643	ug/ml	0.00321269	2	0.270406		NA	NA		82287.1	4454.45	NA	NA	1.3585	1.3585	-0.3585	INF	0.943667	1.8755	0	0	BB	60	3	3	2013-11-09 11:03:43	20.0082	C:\Xcalibur\data\20131108_parkJH_amino_Q\CC18_ACN_G_20min_amino_S_1108_2	C:\Xcalibur\data\20131108_parkJH_amino_Q\AA_GLY_Q_1	D:6	10	0	0	NA	NA	1
AA_125P	Unknown Sample		AA_125P	NA	0.236013	ug/ml	NA	NA	NA		NA	NA		9679.31	1609.71	NA	NA	1.0485	1.0485	-0.0485	INF	0.8425	1.21983	-9.76042	-9.06686	BB	60	3	3	2013-11-08 13:41:21	20.0445	C:\Xcalibur\data\20131108_parkJH_amino_Q\CC18_ACN_G_20min_amino_S_1108_2	C:\Xcalibur\data\20131108_parkJH_amino_Q\AA_GLY_Q_1	D:1	10	0	0	NA	NA	1
AA_125P_1	Unknown Sample		AA_125P_1	NA	NF	ug/ml	NF	NA	NF	Not Found	NF	NA		NF	NF			NF	NF	NF	NF	NF	NF	NF	NF	NF	60	3	3	2013-11-08 20:55:43	20.0418	C:\Xcalibur\data\20131108_parkJH_amino_Q\CC18_ACN_G_20min_amino_S_1108_2	C:\Xcalibur\data\20131108_parkJH_amino_Q\AA_GLY_Q_1	D:1	10	0	0	0	0	1
AA_125P_2	Unknown Sample		AA_125P_2	NA	3.24153	ug/ml	NA	NA	NA		NA	NA		132941	4061	NA	NA	1.43283	1.43283	-0.432833	INF	0.846833	2.36833	0	0	BB	60	3	3	2013-11-09 04:10:00	20.045	C:\Xcalibur\data\20131108_parkJH_amino_Q\CC18_ACN_G_20min_amino_S_1108_2	C:\Xcalibur\data\20131108_parkJH_amino_Q\AA_GLY_Q_1	D:1	10	0	0	NA	NA	1
AA_125P_3	Unknown Sample		AA_125P_3	NA	2.98765	ug/ml	NA	NA	NA		NA	NA		122529	3561.98	NA	NA	1.21083	1.21083	-0.210833	INF	0.841167	2.34983	-4.2253	-5.97212	BB	60	3	3	2013-11-09 09:20:22	19.988	C:\Xcalibur\data\20131108_parkJH_amino_Q\CC18_ACN_G_20min_amino_S_1108_2	C:\Xcalibur\data\20131108_parkJH_amino_Q\AA_GLY_Q_1	D:1	10	0	0	NA	NA	1
b	Unknown Sample		b	NA	NF	ug/ml	NF	NA	NF	Not Found	NF	NA		NF	NF			NF	NF	NF	NF	NF	NF	NF	NF	NF	60	3	3	2013-11-08 13:20:30	19.9822	C:\Xcalibur\data\20131108_parkJH_amino_Q\CC18_ACN_G_20min_amino_S_1108_2	C:\Xcalibur\data\20131108_parkJH_amino_Q\AA_GLY_Q_1	A:1	10	0	0	0	0	1
b1	Unknown Sample		b1	NA	NF	ug/ml	NF	NA	NF	Not Found	NF	NA		NF	NF			NF	NF	NF	NF	NF	NF	NF	NF	NF	60	3	3	2013-11-08 16:06:01	20.036	C:\Xcalibur\data\20131108_parkJH_amino_Q\CC18_ACN_G_20min_amino_S_1108_2	C:\Xcalibur\data\20131108_parkJH_amino_Q\AA_GLY_Q_1	A:1	10	0	0	0	0	1
b5	Unknown Sample		b5	NA	NF	ug/ml	NF	NA	NF	Not Found	NF	NA		NF	NF			NF	NF	NF	NF	NF	NF	NF	NF	NF	60	3	3	2013-11-09 06:34:38	20.0325	C:\Xcalibur\data\20131108_parkJH_amino_Q\CC18_ACN_G_20min_amino_S_1108_2	C:\Xcalibur\data\20131108_parkJH_amino_Q\AA_GLY_Q_1	A:1	10	0	0	0	0	1
b8	Unknown Sample		b8	NA	NF	ug/ml	NF	NA	NF	Not Found	NF	NA		NF	NF			NF	NF	NF	NF	NF	NF	NF	NF	NF	60	3	3	2013-11-09 12:05:40	20.0373	C:\Xcalibur\data\20131108_parkJH_amino_Q\CC18_ACN_G_20min_amino_S_1108_2	C:\Xcalibur\data\20131108_parkJH_amino_Q\AA_GLY_Q_1	A:1	10	0	0	0	0	1
Gly_control	Unknown Sample		Gly_control	NA	321.621	ug/ml	NA	NA	NA	Response High	NA	NA		1.31903e+07	474362	NA	NA	1.48583	1.48583	-0.485833	18.1828	0.943167	2.12533	-1752.85	16904.6	BM	60	3	3	2013-11-08 18:10:13	20.0228	C:\Xcalibur\data\20131108_parkJH_amino_Q\CC18_ACN_G_20min_amino_S_1108_2	C:\Xcalibur\data\20131108_parkJH_amino_Q\AA_GLY_Q_1	D:13	10	0	0	NA	NA	1
Gly_pin	Unknown Sample		Gly_pin	NA	348.38	ug/ml	NA	NA	NA	Response High	NA	NA		1.42877e+07	437690	NA	NA	1.40533	1.40533	-0.405333	14.231	0.948167	2.12767	-2027.66	36380.8	BM	60	3	3	2013-11-08 17:49:32	20.0252	C:\Xcalibur\data\20131108_parkJH_amino_Q\CC18_ACN_G_20min_amino_S_1108_2	C:\Xcalibur\data\20131108_parkJH_amino_Q\AA_GLY_Q_1	D:12	10	0	0	NA	NA	1
Gly_plane	Unknown Sample		Gly_plane	NA	361.385	ug/ml	NA	NA	NA	Response High	NA	NA		1.48211e+07	483145	NA	NA	1.4065	1.4065	-0.4065	29.2879	0.9455	1.94333	-2018.7	55597.1	BM	60	3	3	2013-11-08 17:28:42	20.0208	C:\Xcalibur\data\20131108_parkJH_amino_Q\CC18_ACN_G_20min_amino_S_1108_2	C:\Xcalibur\data\20131108_parkJH_amino_Q\AA_GLY_Q_1	D:11	10	0	0	NA	NA	1
